# Supplementary material for: Accelerated sequences of 4D flow MRI using GRAPPA and compressed sensing: A comparison against conventional MRI and computational fluid dynamics
Source: PubMed Central journal article supplement (PMC9804839; doi:10.1002/mrm.29404), 2022-08-25
Supplement: MRM-88-2432-s009.pdf [file MRM-88-2432-s009.pdf]

1 SUPPORTING INFORMATION - FIGURES

2

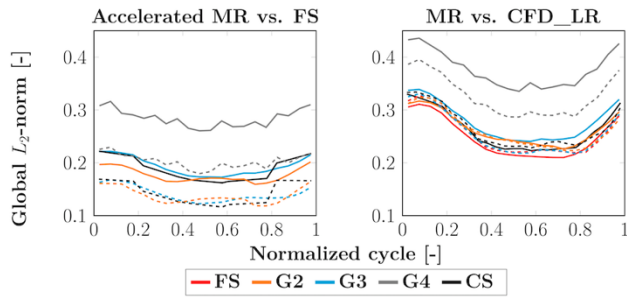

3

4 *Figure S1: Global  $L_2$ -norm of the velocity vector differences along the cardiac cycle for all MR*  
 5 *acquisitions. On the left, the accelerated MR sequences are compared to the fully sampled*  
 6 *MR acquisition. On the right, the MR sequences are compared to CFD\_LR. The solid lines*  
 7 *refer to the average over all voxels of the segmented volume, whereas the dashed ones*  
 8 *correspond to the average over the voxels strictly included inside the phantom segmentation.*

9

10

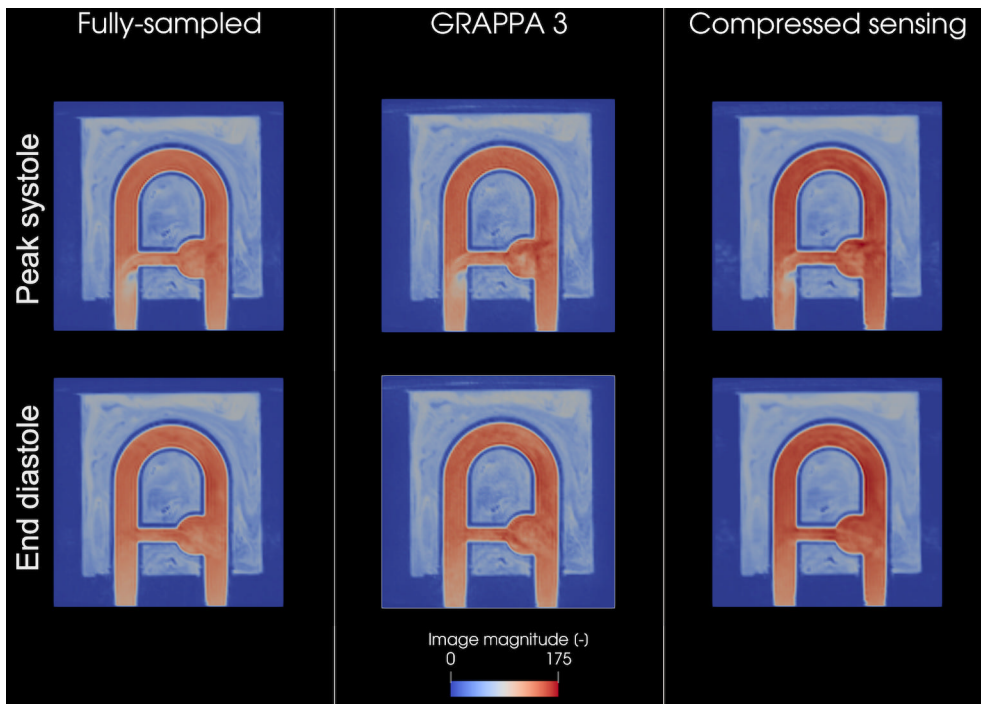

11

12

13

14

*Figure S2: Image magnitude before any correction at peak systole (above) and end diastole*  
*(below) for the fully sampled, GRAPPA 3 and compressed sensing 4D flow MRI acquisitions.*

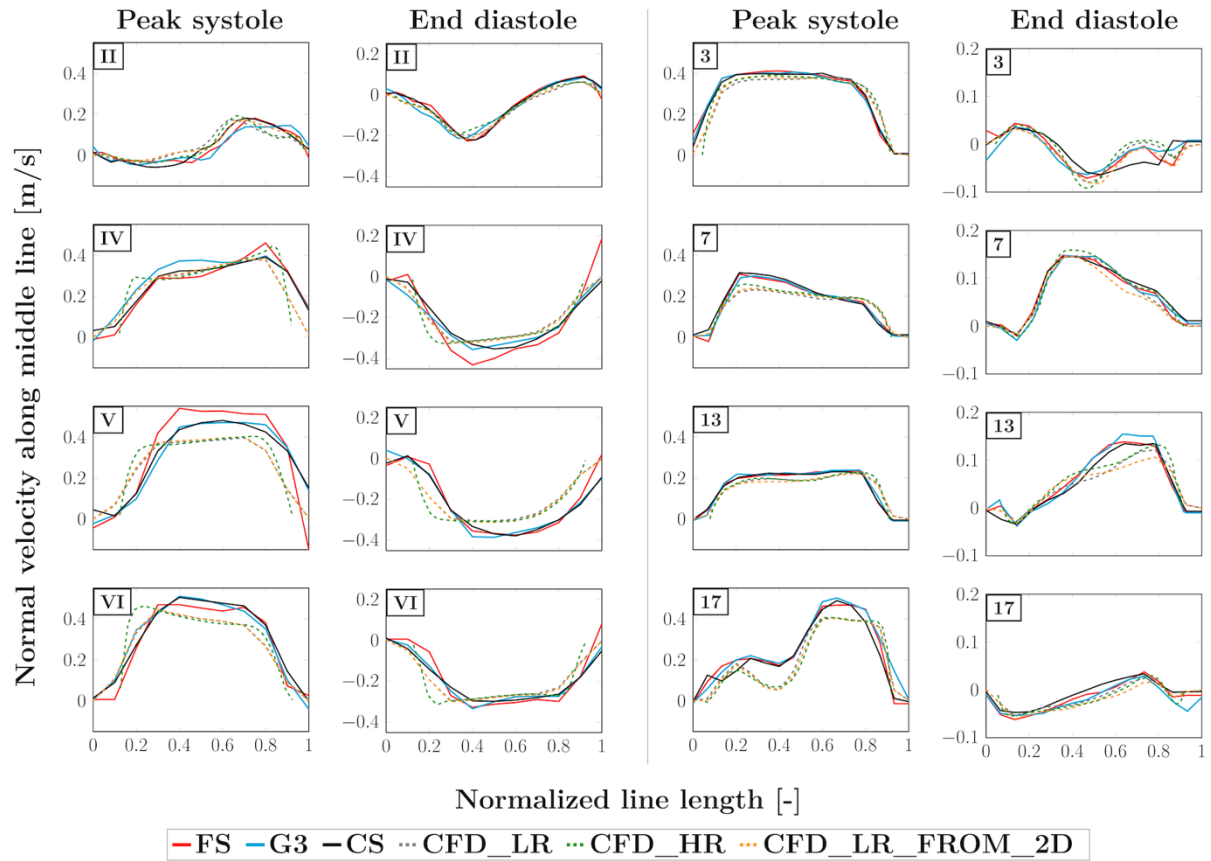

15

16 *Figure S3: Velocity profiles along lines located in the coronal plane passing through the middle*  
 17 *of the phantom. The velocity displayed corresponds to the projection onto the normal of the*  
 18 *planes perpendicular to the ducts, referenced as in Figure 3. It is the analogous plot of Figure*  
 19 *6, where the curves from the additional downsampled CFD simulations based on a 2D PC-*  
 20 *MRI have been added (CFD\_LR\_FROM\_2D). The former curves are kept for reference.*

21

WITH EDDY CURRENT CORRECTION

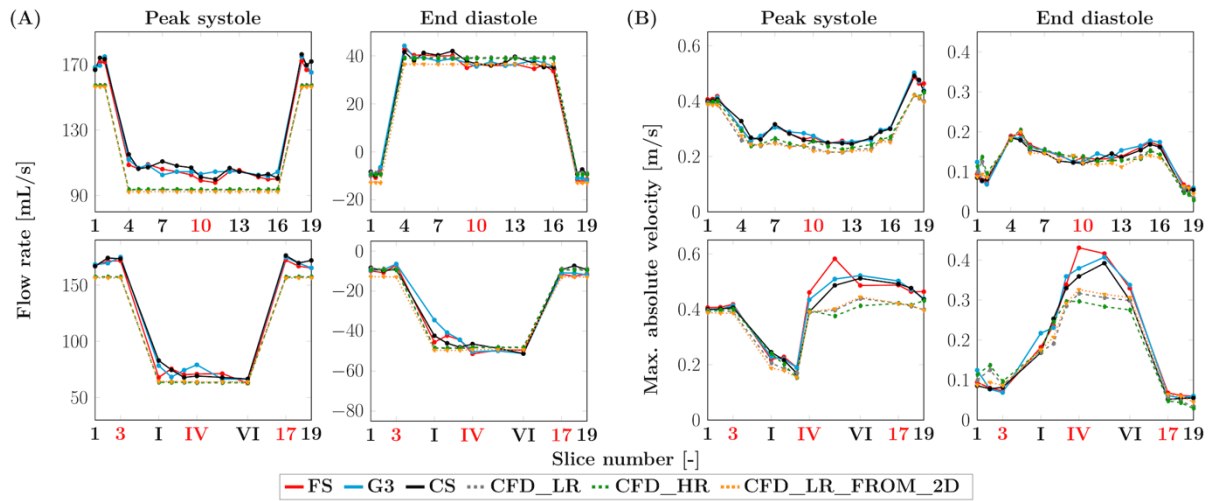

22

23 *Figure S4: Flow rates (computed on all voxels) and peak velocities (computed on inner voxels*  
 24 *only) for the velocity fields after eddy current correction, divided in (A) Flow rates and (B) Peak*  
 25 *velocities at peak systole and end diastole. **Above:** along the main duct from planes 1 to 19.*  
 26 ***Below:** along the collateral duct, from planes 1-3, I-VI and 17-19, as referenced in Figure 3. It*  
 27 *is the analogous plot of Figure 9, where the curves from the additional downsampled CFD*  
 28 *simulations based on a 2D PC-MRI have been added (CFD\_LR\_FROM\_2D). The former*  
 29 *curves are kept for reference.*

30
